# Supplementary material
Source: Royal Society of Chemistry journal article supplement (doi:10.1039/d6nr00693k)
Supplement: d6nr00693k1.pdf [file d6nr00693k1.pdf]

Electronic Supporting Information for

## Unravelling the structure of broadband white-emitting silver nanoclusters stabilized in sulfur-doped zeolites

*José Adán Moreno-Torres,<sup>a</sup> Catarina Viola,<sup>b,c</sup> Francesco D'Acapito,<sup>d</sup> Paul Thompson,<sup>e</sup> Andreia Ruivo,<sup>c</sup> César A T Laia,<sup>b,c</sup> Peter Lievens,<sup>f</sup> Eduardo Coutino-Gonzalez,<sup>g,\*</sup> and Didier Grandjean<sup>f,\*</sup>*

<sup>a</sup>Centro de Física Aplicada y Tecnología Avanzada, Universidad Nacional Autónoma de México, Boulevard Juriquilla 3001, Juriquilla, Santiago de Querétaro, 76230 Querétaro, México.

<sup>b</sup>LAQV@REQUIMTE, Chemistry Department, NOVA School of Science and Technology (NOVA FCT), 2829-516 Caparica, Portugal.

<sup>c</sup>Research Unit VICARTE, Vidro e Cerâmica para as Artes, NOVA School of Science and Technology (NOVA FCT), 2829-516 Caparica, Portugal.

<sup>d</sup>Consiglio Nazionale delle Ricerche–Istituto Officina dei Materiali–Operative Group in Grenoble (CNR-IOM-OGG), The European Synchrotron (ESRF) LISA Collaborating Research Group, Grenoble, France.

<sup>e</sup>XMaS UK CRG Beamline, ESRF – The European Synchrotron, 71, avenue des Martyrs, 38043 Grenoble, France.

<sup>f</sup>Quantum Solid State Physics, KU Leuven, Celestijnenlaan 200D, B-3001 Leuven, Belgium.

<sup>g</sup>Interuniversity Microelectronics Center (imec), Kapeldreef 75, 3001 Leuven, Belgium.

**\*Corresponding authors:** *eduardo.coutinogonzalez@imec.be, didier.grandjean@kuleuven.be*

## Contents

|                            |    |
|----------------------------|----|
| 1. Photoluminescence ..... | 3  |
| Figure S1.....             | 3  |
| 2. XANES.....              | 4  |
| Figure S2.....             | 4  |
| 3. EXAFS .....             | 5  |
| 3.1. XEOL-EXAFS .....      | 5  |
| Figure S3.....             | 5  |
| Table S1.....              | 6  |
| Figure S4.....             | 7  |
| Figure S5.....             | 7  |
| Table S2.....              | 8  |
| Figure S6.....             | 11 |
| Figure S7.....             | 12 |
| References .....           | 14 |

## 1. Photolumuminescence

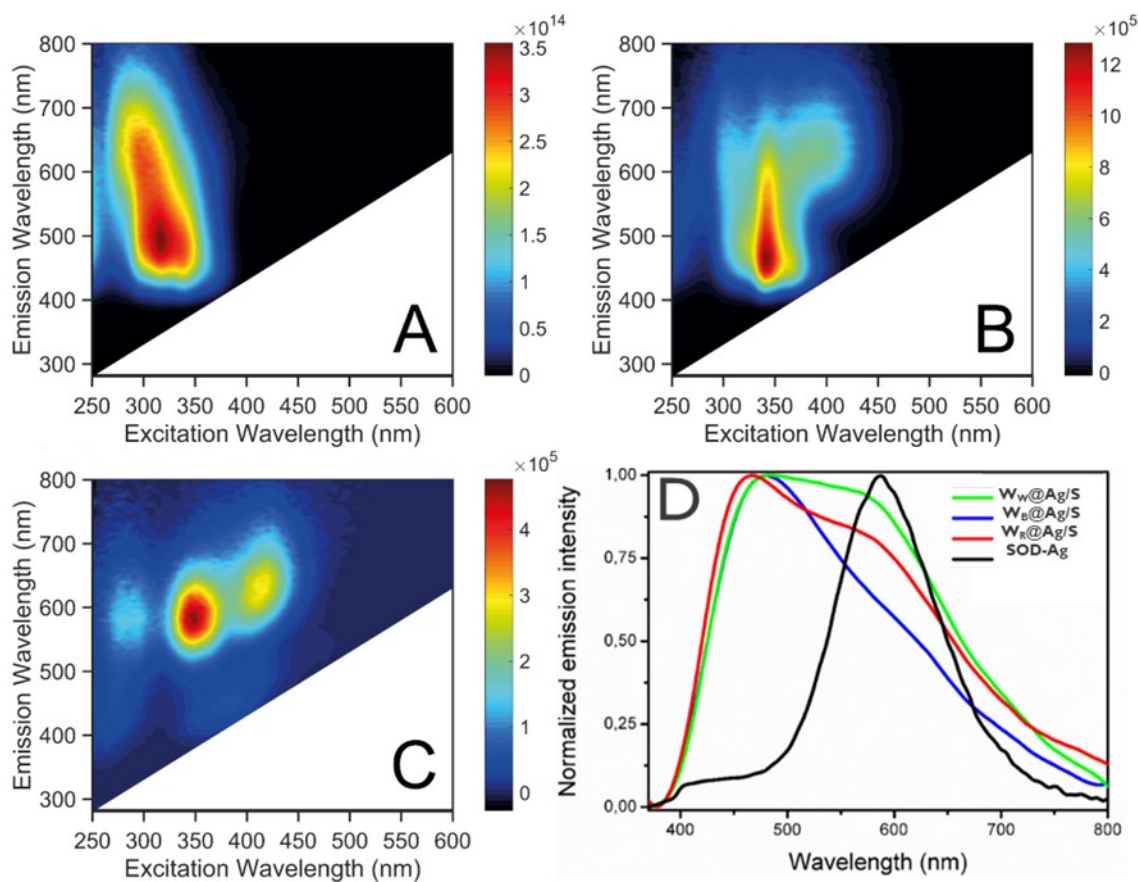

**Figure S1.** Two-dimensional (2D) excitation–emission plots of (A) W<sub>B</sub>@Ag/S, (B) W<sub>R</sub>@Ag/S, and (C) SOD-Ag. (D) Emission profile spectra of the investigated samples excited at 340 nm.

**Figure S1** shows the 2D excitation–emission plots of the W<sub>B</sub>@Ag/S, W<sub>R</sub>@Ag/S, and SOD-Ag samples. After the incorporation of Ag species, a main emission peak is observed at 315 nm in W<sub>B</sub>@Ag/S (**Figure S1A**), which shifts slightly to 300 nm for higher emission wavelengths. These emissive species also exhibit broad blue–white emission with a maximum around 495 nm. On the other hand, W<sub>R</sub>@Ag/S (**Figure S1B**) exhibits a remarkable similarity to W<sub>w</sub>@Ag/S (**Figure 1A**). However, the red orange emitting species, excited at 400 nm with an emission maximum at 635 nm, are more favoured, while the blue-emitting species are less prominent. In addition, a main emissive species is observed under excitation at 340 nm, producing broad emission centered around 465 nm. Likewise, the SOD-Ag sample (**Figure S1C**) prepared for comparative purposes shows two main peaks: one centered at 350 nm excitation with emission at 580 nm, and the other

at 415 nm excitation with an emission maximum around 635 nm. **Figure S1D** depicts the emission spectra profiles of the investigated samples under 340 nm excitation.

## 2. XANES

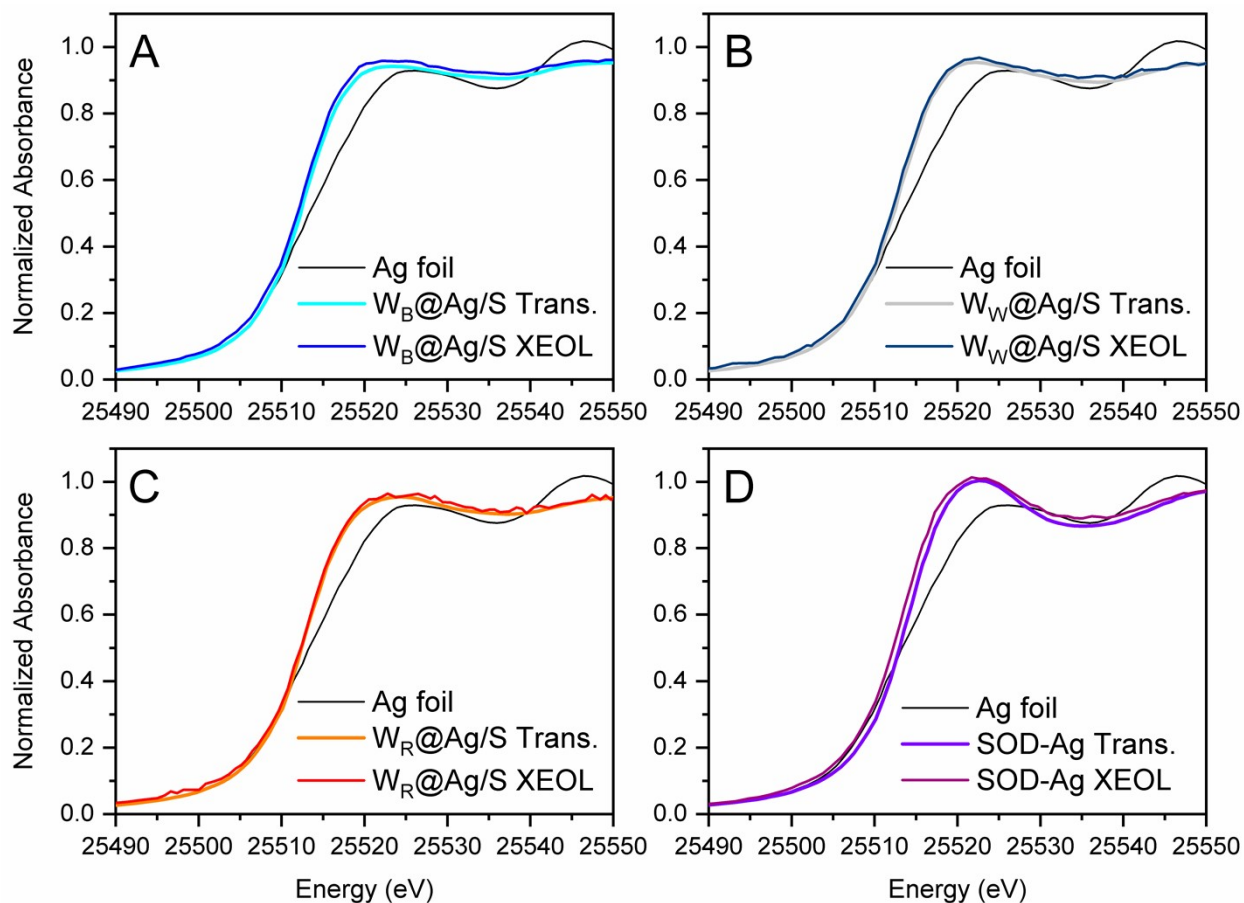

**Figure S2.** XEOL and transmission-detected Ag K-edge XANES spectra of (A) Ag/S-B, (B) Ag/S-W, (C) Ag/S-R, and (D) Ag-SOD along with reference Ag foil.

### 3. EXAFS

#### 3.1. XEOL-EXAFS

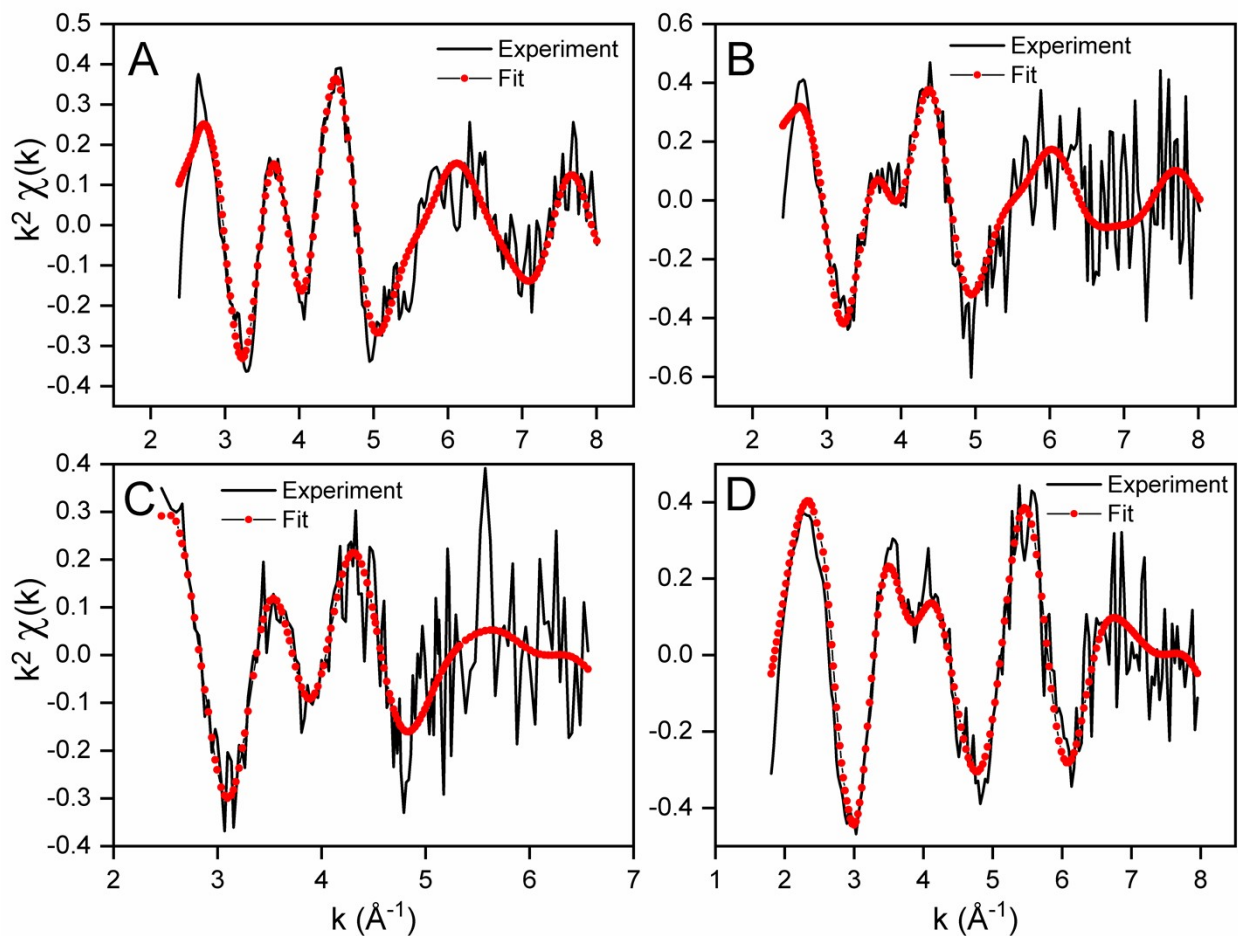

Figure S3. XEOL-detected Ag K-edge  $k^2$ -weighted EXAFS (A)  $W_B@Ag/S$ , (B)  $W_W@Ag/S$ , (C)  $W_R@Ag/S$ , and (D) SOD-Ag best fits.

**Table S1.** Summary of structural results of Ag K-edge EXAFS refinements of the Ag/S Sodalites in XEOL-detection mode.

| Sample       | $W_B@Ag/S$ | $W_W@Ag/S$  | $W_R@Ag/S$ | SOD-Ag     |
|--------------|------------|-------------|------------|------------|
| AFAC         | 0.9        | 0.9         | 0.9        | 0.9        |
| k weight     | 2          | 2           | 2          | 2          |
| k-range      | 2-8        | 2-8         | 2-7        | 2-8        |
| $E_f$ (eV)   | 3.6 (10)   | 3.5 (10)    | -7.6 (10)  | -4.9 (5)   |
| $N_1$        | 1.0 (1) O  | 1.9 (4) O   | 2.2 (9) O  | 2.5 (3) O  |
| $R_1$        | 2.15 (2)   | 2.20 (3)    | 2.30 (9)   | 2.38 (1)   |
| $A_1$        | 0.008 (6)  | 0.02 (1)    | 0.06 (4)   | 0.015 (6)  |
| $N_2$        | 2.5 (9) Ag | 2.9 (9) Ag  | 3.7 (9) Ag | 3.8 (3) Ag |
| $R_2$        | 2.65 (5)   | 2.74 (7)    | 2.79 (9)   | 2.84 (3)   |
| $A_2$        | 0.07 (3)   | 0.11 (5)    | 0.08 (7)   | 0.03 (1)   |
| $N_4$        | 2.5 (9) Ag | 2.4 (9) Ag  | 2.2 (9) Ag | 1.1 (6) Ag |
| $R_4$        | 3.35(6)    | 3.39 (7)    | 3.5 (1)    | 3.7 (1)    |
| $A_4$        | 0.022 (2)  | 0.03 (2)    | 0.01 (3)   | 0.03 (7)   |
| $N_5$        | 4.4 (9) Ag | 4.4 (10) Ag | 2.4 (9) Ag | 2.0 (9) Ag |
| $R_5$        | 3.60 (6)   | 3.63 (6)    | 3.8 (1)    | 3.96 (9)   |
| $A_5$        | 0.02 (2)   | 0.018 (6)   | 0.01 (3)   | 0.03 (5)   |
| <b>R (%)</b> | 37 %       | 51 %        | 56 %       | 37%        |

$E_f$  = contribution of the wave vector of the zero-photoelectron relative to the origin of k [eV]

**AFAC** = amplitude reduction due to many-electron processes

$N_i$  = number of atoms in the  $i^{\text{th}}$  shell

$R_i$  = radial distance of atoms in the  $i^{\text{th}}$  shell [Å]

$A_i$  = Debye-Waller term of the  $i^{\text{th}}$  shell ( $A=2\sigma^2$  with  $\sigma$  = Debye-Waller factor) [Å<sup>2</sup>]

**R** factor in %

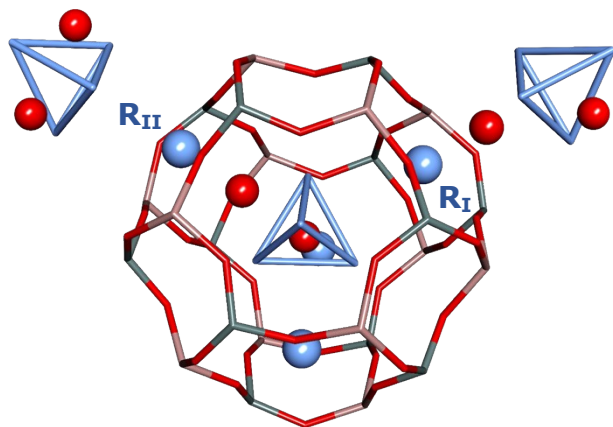

Figure S4. Schematic structural model showing the arrangement of several  $\text{Ag}_4\text{O}_2$  NCs embedded in contiguous sodalite cages, highlighting the position of  $\text{Ag}_{\text{RI}}$  and  $\text{Ag}_{\text{RII}}$  cations in the single six-membered rings (S6Rs).

Comment [EC]: Referee 2.- We have included the chemical formula of the sodalite.

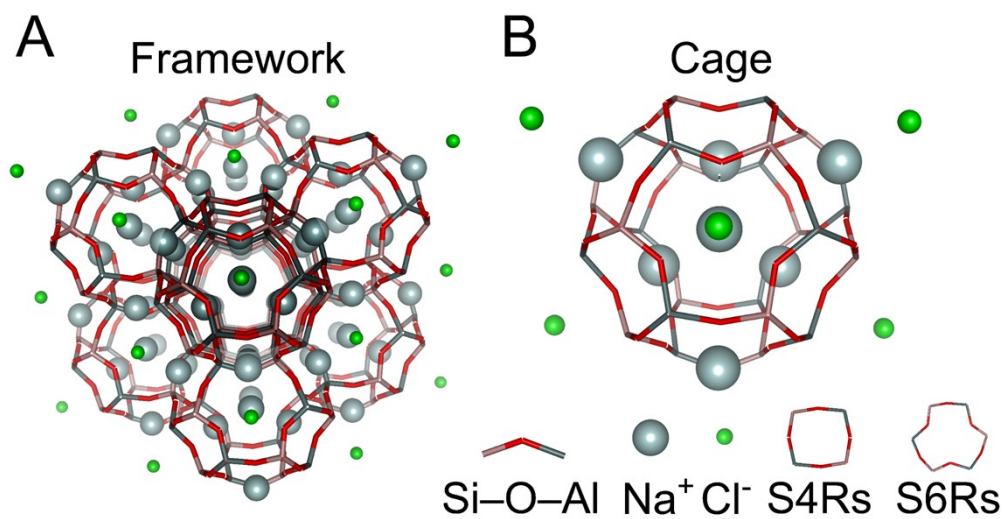

Figure S5. (A) Structural view of the SOD  $(\text{Na}_8[\text{Al}_6\text{Si}_6\text{O}_{24}]\text{Cl}_2)$  framework. (B) Enlarged sodalite cage showing Si–O–Al connectivity, extra-framework cations ( $\text{Na}^+$ , large spheres;  $\text{Cl}^-$ , small spheres), and the characteristic single four-membered rings (S4Rs) and six-membered rings (S6Rs) that result in a compact structure without supercages.



### 3.2. Transmission-EXAFS

Table S2. Summary of structural results of Ag K-edge EXAFS refinements of the Ag/S sodalite in transmission-detection mode.

| Sample     | $W_B@Ag/S$ | $W_W@Ag/S$ | $W_R@Ag/S$ | SOD-Ag     |
|------------|------------|------------|------------|------------|
| AFAC       | 0.9        | 0.9        | 0.9        | 0.9        |
| K weight   | 3          | 3          | 3          | 3          |
| k-range    | 2-11       | 2-11.4     | 2-10.5     | 2-11       |
| $E_f$ (eV) | 2.0 (9)    | 0.4 (9)    | -2.8 (7)   | 0.5 (3)    |
| $N_1$      | 1.7 (3) O  | 2.4 (3) O  | 2.5 (3) O  | 3.1 (1) O  |
| $R_1$      | 2.22 (2)   | 2.29 (2)   | 2.28 (2)   | 2.341 (4)  |
| $A_1$      | 0.049 (9)  | 0.041 (7)  | 0.047 (7)  | 0.025 (1)  |
| $N_2$      | 2.1 (2) Ag | 2.3 (6) Ag | 3.0 (4) Ag | 2.8 (2) Ag |
| $R_2$      | 2.61 (4)   | 2.71 (4)   | 2.71 (3)   | 2.74 (1)   |
| $A_2$      | 0.08 (1)   | 0.06 (1)   | 0.07 (1)   | 0.047 (2)  |
| $N_3$      | 1.1 (2) SA | 1.2 (5) SA | 0.9 (1) SA | 1.4 (2) SA |
| $R_3$      | 3.27 (1)   | 3.33 (2)   | 3.33 (2)   | 3.289 (7)  |
| $A_3$      | 0.014 (4)  | 0.014 (6)  | 0.012 (3)  | 0.014 (2)  |
| $N_4$      | 4.3 (9) Ag | 4.0 (9) Ag | 1.8 (2) Ag | 1.9 (3) Ag |
| $R_4$      | 3.44(2)    | 3.50 (3)   | 3.51 (2)   | 3.50 (2)   |
| $A_4$      | 0.047 (7)  | 0.047 (8)  | 0.028 (4)  | 0.042 (6)  |
| $N_5$      | 4.3 (6) Ag | 4.2 (9) Ag | 1.6 (7) Ag | 3.0 (4) Ag |
| $R_5$      | 3.69 (4)   | 3.77 (4)   | 3.77 (3)   | 3.77 (1)   |
| $A_5$      | 0.07 (1)   | 0.05 (1)   | 0.03 (1)   | 0.043 (4)  |
| $N_6$      | 0.4 (2) Ag | 0.4(3) Ag  | 1.0 (7) Ag | 0.9(4) Ag  |
| $R_6$      | 4.45 (2)   | 4.44 (3)   | 4.44 (4)   | 4.45 (1)   |
| $A_6$      | 0.008 (5)  | 0.011 (7)  | 0.03 (1)   | 0.024 (7)  |
| $N_7$      | 0.34 (3) S | 0.25 (8) S | 0.3 (2) S  |            |
| $R_7$      | 2.393 (6)  | 2.46 (1)   | 2.41 (1)   |            |

|                                            |           |           |           |     |
|--------------------------------------------|-----------|-----------|-----------|-----|
| <b>A<sub>7</sub></b>                       | 0.003 (2) | 0.009 (4) | 0.013 (4) |     |
| <b>R (%)</b>                               | 26 %      | 30 %      | 25 %      | 13% |
| <b>Ag<sub>C</sub> - Ag<sub>C</sub></b>     | 2.6       | 2.9       | 3.5       | 3.7 |
| <b>Coordination</b>                        |           |           |           |     |
| <b>Ag<sub>C</sub>-O<sub>L</sub></b>        | 1.2       | 1.8       | 2.2       | 3.1 |
| <b>Coordination</b>                        |           |           |           |     |
| <b>Ag<sub>C</sub> / Ag<sub>R</sub> (%)</b> | 82        | 80        | 85        | 77  |

**E<sub>f</sub>** = contribution of the wave vector of the zero-photoelectron relative to the origin of k [eV]

**AFAC** = amplitude reduction due to many-electron processes

**N<sub>i</sub>** = number of atoms in the i<sup>th</sup> shell

**R<sub>i</sub>** = radial distance of atoms in the i<sup>th</sup> shell [Å]

**A<sub>i</sub>** = Debye-Waller term of the i<sup>th</sup> shell ( $A=2\sigma^2$  with  $\sigma$  = Debye-Waller factor) [Å<sup>2</sup>]

**R** factor in %

As in our previous work in Ag exchanged LTA zeolites, the Tr-EXAFS analysis of their sodalite counterpart is based on a the three-shell model (Ag–O, Ag–Ag, and Ag–Si/Al).<sup>1</sup> In this model, we include a virtual mixed Si/Al site corresponding to 0.5 Si:0.5 Al occupancy that better reflects the 1.3 Si/Al ratio of the sodalite. Crystallographic data of SOD [ICDD card 41190] were used to support the EXAFS analysis and to obtain information related to the nuclearity of these NCs from the fitting results. Details of the fitting parameters are provided in **Table S2**. EXAFS data were fitted with  $k^3$  weighting as it is more sensitive to heavy atoms such as Ag and intensifies the high  $k$ -range of the spectra. Besides, as Ag-NC atoms do not occupy fixed crystallographic positions weak Ag–Ag bonds with relatively large static disorder (DWF) are observed, making them difficult to detect.<sup>2</sup> Thus,  $k^3$  weighting provides more useful information on the Ag shells.

**Figure S6** shows the  $\chi(k)$   $k^3$ -weighted EXAFS data and the corresponding phase-corrected FT best (**Figure S7**) fits of  $W_B@Ag/S$ ,  $W_W@Ag/S$ ,  $W_R@Ag/S$ , and SOD-Ag. The first peaks in the FTs (**Figure S7**) could be fitted with 1.7, 2.4, 2.5, and 3.1 oxygen atoms at 2.22, 2.29, 2.28, and 2.34 Å in  $W_B@Ag/S$ ,  $W_W@Ag/S$ ,  $W_R@Ag/S$ , and SOD-Ag, respectively. This oxygen shell ( $N_1$ ) corresponds to a combination of zeolite framework O atoms for the Ag cations occupying the center of the S6Rs. Among these cations, two distinct positions can be identified:  $R_{II}$  inside the sodalite cage when no extra-framework O ligand is present between the NC and the  $Ag_R$  cation, and  $R_{II'}$  inside the neighboring sodalite cage when an extra-framework O or  $H_2O$  ligand is coordinated to  $Ag_C$ , forming the NCs (**Figure 4**).

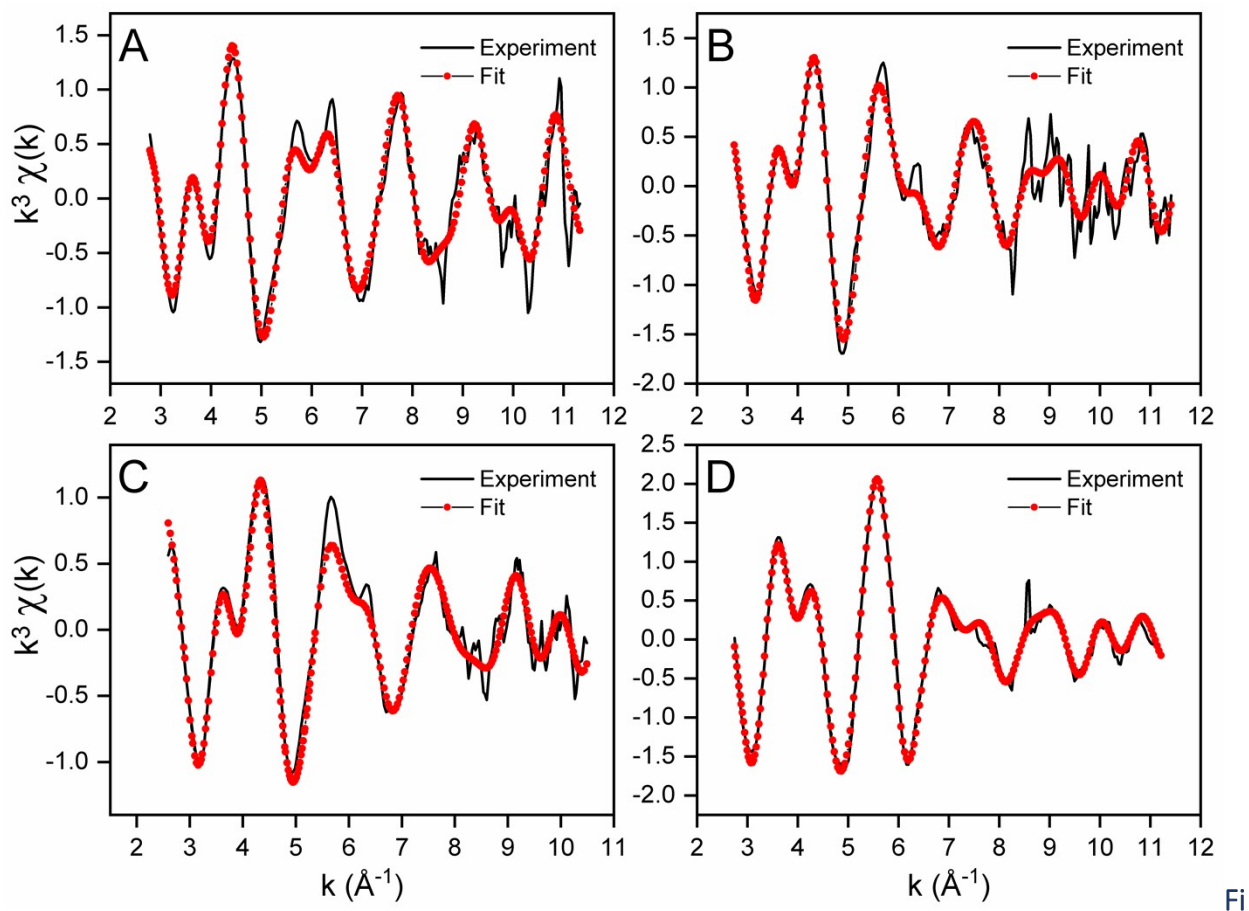

Figure S6. Transmission Ag K-edge  $k^3$ -weighted EXAFS of (A)  $W_B@Ag/S$ , (B)  $W_W@Ag/S$ , (C)  $W_R@Ag/S$ , and (D) SOD-Ag best fits.

The second multi-peaks in the FTs correspond to Ag-Si/Al and Ag-Ag contributions. The Ag-Si/Al shell consists of ( $N_3$ ) of 1.1, 1.2, 0.9, and 1.4 Si/Al atoms at 3.27, 3.33, 3.33, and 3.29 Å in  $W_B@Ag/S$ ,  $W_W@Ag/S$ ,  $W_R@Ag/S$ , and SOD-Ag, respectively. These Si/Al contributions correspond to the  $Ag_{R_{II}}$  and  $R_{II'}$  which are strongly bonded to three framework oxygens ( $N_1$ ) pointing towards the centers of the S6Rs. In the crystallographic model of sodalite,  $Ag_R$  located in the plane of the S6Rs, with the  $R_3$   $Ag_R$ -Si/Al distance obtained by the EXAFS analysis corresponding to crystallographic  $Ag_R$ -O distances of 2.27, 2.35, 2.35, and 2.30 Å in  $W_B@Ag/S$ ,  $W_W@Ag/S$ ,  $W_R@Ag/S$ , and SOD-Ag, respectively. This confirms that  $R_1$  is a combination of long framework O and short extra-framework O atoms at shorter distances in  $W_B@Ag/S$ ,  $W_W@Ag/S$ ,  $W_R@Ag/S$ , and extra-framework water molecules at longer distances in SOD-Ag. The Ag-Ag shell ( $N_2$ ) consists of 2.1, 2.3, 3.0, and 2.8 Ag at 2.61, 2.71, 2.71, and 2.74 Å in  $W_B@Ag/S$ ,

$W_W@Ag/S$ ,  $W_R@Ag/S$ , and SOD-Ag, respectively. This contribution corresponds to the remaining part of the Ag atoms forming oligomeric Ag-NCs located inside the sodalite cages.

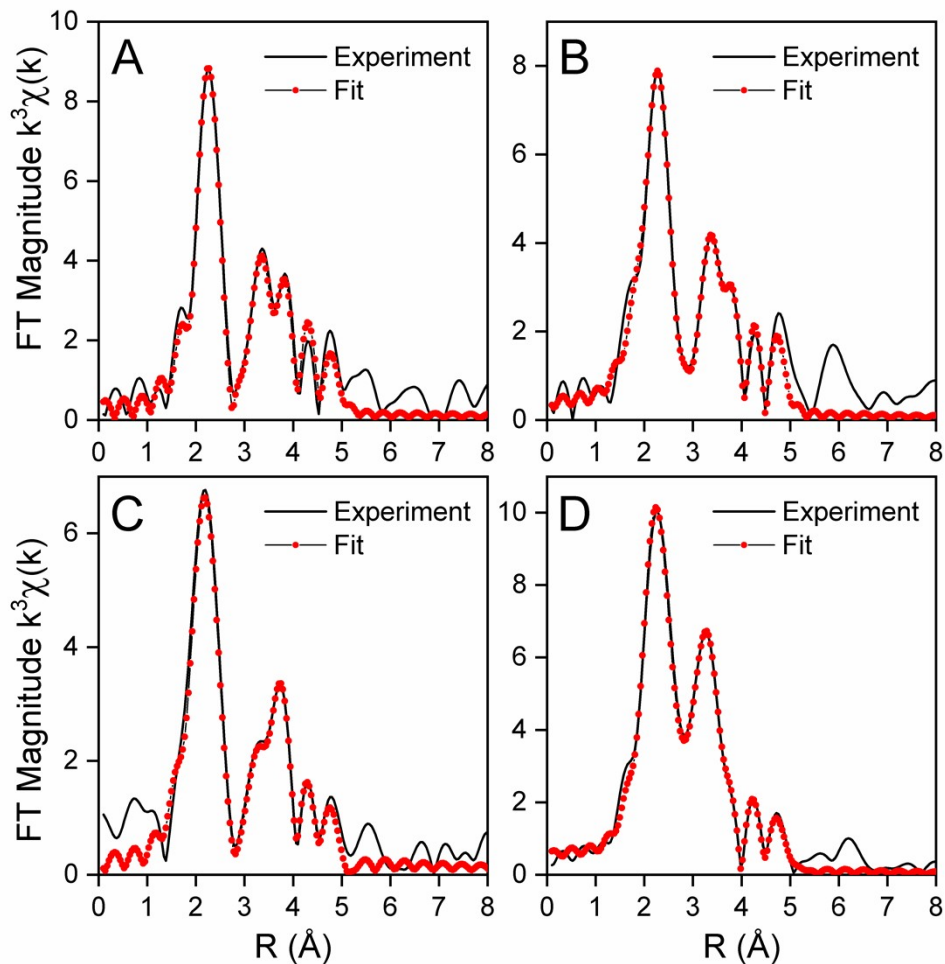

**Figure S7.** Transmission Ag K-edge  $k^3$ -weighted phase corrected FTs of (A)  $W_B@Ag/S$ , (B)  $W_W@Ag/S$ , (C)  $W_R@Ag/S$ , and (D) SOD-Ag best fits.

The total fraction of Ag cations located in the S6Rs ( $Ag_{R11}$  and  $Ag_{R11}'$ ) can be derived as 18, 22, 15, and 22% ( $N_3/6 \times 100$ ) while the fraction of Ag-NCs is 82, 80, 85, and 77% in  $W_B@Ag/S$ ,  $W_W@Ag/S$ ,  $W_R@Ag/S$ , and SOD-Ag, respectively. The corrected equivalent Ag coordination ( $N_4/Ag_C$  fraction) are 2.6, 2.9, 3.5, and 3.7, suggesting that the NC nuclearity in  $W_B@Ag/S$ ,  $W_W@Ag/S$ ,  $W_R@Ag/S$ , and SOD-Ag spans from  $Ag_3$  (CN2) to  $Ag_6$  (CN4).

Each Ag-NC is then coordinated to 1.2, 1.8, 2.2, and 3.1 extra-framework O ligands [( $N_1 - (3 \times \text{Ag}_R \text{ fraction})$ )/ $\text{Ag}_C \text{ fraction}$ ] in  $W_B@Ag/S$ ,  $W_W@Ag/S$ ,  $W_R@Ag/S$ , and SOD-Ag, respectively, in line with the corresponding XEOL-EXAFS determined values of 1.0, 1.9, 2.2, and 2.5. Oxygen ligands consist either of extra-framework O atoms in Ag/S-SOD or of water molecules in SOD-Ag. In  $W_B@Ag/S$ , the 1.2 O coordination corresponds to a mixture of a single extra-framework O atom in  $Ag_3O$  and  $Ag_4O_2$  within the sodalite cage ( $Ag_C$  coordination of 1 and 1.5 respectively). In  $W_W@Ag/S$ , the 1.8 O coordination is in line with the coexistence of  $Ag_3O$ ,  $Ag_4O_2$ , and  $Ag_6O_4$  NCs ( $Ag_C$  coordination of 1, 1.5, and 3, respectively), while in  $W_R@Ag/S$  the CN of 2.2 matches a mixture of  $Ag_4O_2$  and  $Ag_6O_4$  NCs. Finally, in SOD-Ag the CN of 3.1 could correspond to a mixture of  $Ag_6(OH_2)_2$ ,  $Ag_6(OH_2)_4$ , and  $Ag_6(OH_2)_6$  isomers ( $Ag_C$  coordination of 1.5, 3, and 4 respectively).

The addition of three long-distance Ag–Ag shells ( $N_4$ – $N_6$ ) significantly improved the quality of the fit. Inspection of the SOD crystallographic structure suggests that these long Ag–Ag distances correspond to distances from  $Ag_C$  forming the NCs at the center of the sodalite cages to  $Ag_{RII'}$  and  $Ag_{RII}$  sites positioned in the S6Rs within the same sodalite cage.  $N_4$  shell of 1.8 to 4.3 Ag at 3.44 to 3.50 Å, and  $N_5$  shell of 1.6 to 4.3 Ag at 3.69 to 3.77 Å, correspond respectively to  $Ag_C$ – $Ag_{RII}$  and  $Ag_C$ – $Ag_{RII'}$  distances occurring in the presence or absence of a water molecule located near the center of the S6Rs and sandwiched between the two atoms.  $N_6$  shell of 0.4 to 1.0 Ag at 4.44 to 4.45 Å correspond to  $Ag_C$ – $Ag_{RII}$  in the presence of a water molecule when the neighboring cage does not contain a NC. The sharing of the  $Ag_R$  between two neighbor NCs that is specific of the SOD structure results in larger  $Ag_C$ – $Ag_R$  CNs as compared to those found in the LTA zeolite. Finally, a shell of 0.25 to 0.34 S at 2.39 to 2.46 Å ( $N_7$ ) was added to the fit of  $W_B@Ag/S$  and  $W_W@Ag/S$ , confirming the limited interaction of a small number of Ag cations with S atoms during the Ag exchange procedure, in line with the S K-edge XANES (**Figure 2A**).

## References

- 1 T. Yamamoto, S. Takenaka, T. Tanaka and T. Baba, *J. Phys. Conf. Ser.*, 2009, **190**, 012171.
- 2 O. Fenwick, E. Coutiño-Gonzalez, D. Grandjean, W. Baekelant, F. Richard, S. Bonacchi, D. De Vos, P. Lievens, M. Roeffaers, J. Hofkens and P. Samorì, *Nat. Mater.*, 2016, **15**, 1017–1022.
